# Supplementary material for: The Invasion of Alien Populations of Solanum elaeagnifolium in Two Mediterranean Habitats Modifies the Soil Communities in Different Ways
Source: MDPI journal article supplement (doi:10.3390/plants12112193), 2023-05-31
Supplement: s1 [file s1]

# The invasion of alien populations of *Solanum elaeagnifolium* in two Mediterranean habitats modifies the soil communities in different ways

Maria Karmezi <sup>1,\*</sup>, Nikos Krigas <sup>2</sup>, Efimia M. Papatheodorou <sup>3</sup> and Maria D. Argyropoulou <sup>1,\*</sup>

<sup>1</sup> Department of Zoology, School of Biology, Faculty of Sciences, Aristotle University, 54124 Thessaloniki, Greece

<sup>2</sup> Institute of Plant Breeding and Genetic Resources, Hellenic Agricultural Organization Demeter, 57001 Thessaloniki, Greece; nikoskrigas@gmail.com

<sup>3</sup> Department of Ecology, School of Biology, Faculty of Sciences, Aristotle University, 54124 Thessaloniki, Greece; papatheo@bio.auth.gr

\* Correspondence: mkarmezi@bio.auth.gr (M.K); margyrop@bio.auth.gr (M.D.A.)

**Table S1.** Mean concentration ( $\pm$  SE) of PLFA biomarkers (nmol/g) recovered in two different habitat types (Q: *Quercus coccifera* shrublands, P: *Pinus brutia* forests) and three different disturbance regimes (c: core, pr: periphery not invaded, inv: periphery invaded by *Solanum elaeagnifolium*).

| PLFA biomarkers  | Functional groups | Qc           | Qpr          | Qinv         | Pc           | Ppr          | Pinv         |
|------------------|-------------------|--------------|--------------|--------------|--------------|--------------|--------------|
| 2-OH10:0         | G-                |              |              |              | 0.16 (0.10)  | 0.18 (0.11)  |              |
| 2-OH12:0         | G-                |              | 0.44 (0.25)  | 0.29 (0.18)  | 0.41 (0.05)  | 0.55 (0.08)  | 0.49 (0.06)  |
| 3-OH12:0         | G-                |              |              |              | 0.71 (0.35)  | 0.28 (0.19)  | 0.16 (0.16)  |
| 14:0             | Microbia          | 3.93 (0.73)  | 4.95 (0.37)  | 5.40 (1.46)  | 22.66 (1.54) | 23.78 (0.90) | 14.88 (1.51) |
| i15:0            | G+                | 18.35 (2.82) | 20.36 (1.70) | 24.75 (4.93) | 32.19 (1.42) | 32.86 (0.85) | 29.25 (1.79) |
| a15:0            | G+                | 11.09 (1.82) | 14.05 (1.44) | 16.20 (3.18) | 24.39 (2.21) | 25.68 (0.30) | 20.48 (2.02) |
| 15:0             | Bacteria          | 2.35 (0.56)  | 2.34 (0.29)  | 2.48 (0.98)  | 7.54 (0.94)  | 7.71 (0.61)  | 4.81 (0.49)  |
| 2-OH14:0         | G-                |              |              | 0.03 (0.03)  |              | 0.80 (0.80)  |              |
| 3-OH14:0         | G-                |              | 0.32 (0.19)  | 0.60 (0.36)  | 0.97 (0.21)  | 2.30 (1.58)  | 1.12 (0.60)  |
| i16:0            | G+                | 10.65 (1.27) | 12.17 (1.14) | 13.39 (2.79) | 22.43 (1.43) | 17.20 (5.75) | 18.92 (1.89) |
| 16:1 $\omega$ 7c | G-                | 11.45 (1.76) | 12.43 (1.51) | 14.71 (3.01) | 22.02 (1.07) | 21.75 (0.20) | 15.80 (5.37) |
| 16:0             | Bacteria/fungi    | 28.55 (1.82) | 28.97 (3.33) | 33.17 (4.65) | 38.77 (4.04) | 40.01 (0.36) | 35.43 (1.38) |
| 10Me16:0         | Actinobacteria    | 7.29 (1.10)  | 7.72 (0.97)  | 9.90 (2.17)  | 13.30 (0.66) | 12.30 (0.82) | 11.20 (1.01) |
| i17:0            | G+                | 5.42 (0.54)  | 6.09 (0.66)  | 7.09 (1.57)  | 11.95 (1.09) | 12.18 (0.61) | 8.82 (0.75)  |
| 17:1 $\omega$ 7c | G-                | 2.52 (0.34)  | 2.85 (0.21)  | 3.95 (1.28)  | 7.81 (1.17)  | 8.84 (0.67)  | 5.49 (0.55)  |
| cy17:0           | G-                | 6.99 (0.78)  | 7.74 (0.87)  | 4.93 (1.82)  | 16.82 (1.22) | 15.28 (0.91) | 12.68 (1.20) |
| 17:0             | Bacteria          | 4.62 (0.48)  | 5.41 (0.44)  | 6.01 (1.22)  | 8.52 (0.91)  | 8.68 (0.47)  | 8.21 (1.09)  |
| 2-OH16:0         | G-                |              |              |              | 0.05 (0.05)  |              | 0.47 (0.47)  |
| 10Me17:0         | Actinobacteria    | 1.48 (0.21)  | 1.88 (0.23)  | 1.92 (0.39)  | 4.25 (0.48)  | 4.66 (0.50)  | 2.76 (1.02)  |
| 18:3 $\omega$ 6c | Fungi             | 0.40 (0.16)  | 0.70 (0.11)  | 1.03 (0.42)  | 1.96 (0.24)  | 2.25 (0.13)  | 1.70 (0.47)  |
| 18:2 $\omega$ 6c | Fungi             | 6.96 (0.55)  | 7.35 (0.97)  | 7.52 (1.46)  | 18.33 (1.08) | 15.64 (0.72) | 12.52 (0.59) |
| 18:1 $\omega$ 9c | G-/fungi          | 16.86 (1.36) | 17.91 (1.52) | 20.07 (3.41) | 24.60 (1.41) | 25.54 (0.49) | 22.64 (1.25) |
| 18:1 $\omega$ 9t | G-/fungi          | 14.80 (1.82) | 15.07 (1.76) | 17.61 (3.32) | 25.87 (2.48) | 24.03 (2.15) | 20.96 (1.67) |
| 18:0             | Microbia          | 8.76 (0.95)  | 9.97 (1.19)  | 11.68 (2.45) | 19.62 (2.71) | 20.66 (0.34) | 18.05 (1.98) |
| 10Me18:0         | Actinobacteria    | 5.17 (0.80)  | 6.29 (0.94)  | 6.79 (1.33)  | 10.93 (0.88) | 12.01 (1.08) | 10.08 (1.39) |
| cy19:0           | G-                | 0.87 (0.17)  | 1.22 (0.31)  | 1.46 (0.52)  | 2.51 (0.28)  | 3.12 (0.22)  | 1.58 (0.15)  |
| 20:4 $\omega$ 6c | Protozoa          | 0.19 (0.05)  | 0.30 (0.04)  | 0.40 (0.12)  | 0.06 (0.06)  |              | 0.66 (0.41)  |
| 20:5 $\omega$ 3c | Micro-eukaryotes  | 0.23 (0.10)  | 0.25 (0.07)  | 0.34 (0.10)  | 0.46 (0.09)  | 0.57 (0.09)  | 0.53 (0.09)  |
| 20:3 $\omega$ 6c | Protozoa          | 0.79 (0.22)  | 0.93 (0.19)  | 1.30 (0.56)  | 1.92 (0.32)  | 2.66 (0.35)  | 2.16 (0.56)  |
| 20:2 $\omega$ 6c | Protozoa          | 0.69 (0.07)  | 0.64 (0.04)  | 0.69 (0.09)  | 0.62 (0.06)  | 0.67 (0.06)  | 0.73 (0.02)  |
| 20:0             | Microbia          | 1.91 (0.38)  | 1.93 (0.21)  | 2.40 (0.78)  | 7.88 (0.64)  | 10.43 (0.55) | 5.68 (0.57)  |
| 22:6 $\omega$ 3c | Micro-eukaryotes  | 2.17 (0.64)  | 1.87 (0.43)  | 2.10 (0.53)  | 3.32 (0.43)  | 2.84 (0.40)  | 4.29 (0.45)  |

| PLFA biomarkes | Functional groups | Qc          | Qpr         | Qinv        | Pc          | Ppr          | Pinv        |
|----------------|-------------------|-------------|-------------|-------------|-------------|--------------|-------------|
| 22:0           | Micro-eukaryotes  | 1.45 (0.19) | 1.70 (0.07) | 2.14 (0.71) | 8.78 (0.84) | 12.80 (0.74) | 5.32 (0.68) |
| 23:0           | Micro-eukaryotes  | 0.17 (0.03) | 0.15 (0.01) | 0.25 (0.08) | 0.53 (0.20) | 1.07 (0.08)  | 0.45 (0.04) |
| 24:0           | Micro-eukaryotes  | 0.55 (0.12) | 0.58 (0.03) | 0.71 (0.22) | 5.00 (0.62) | 6.82 (0.56)  | 2.02 (0.18) |

**Table S2.** Biomass of microbial groups (nmol/g) in each composite sample taken from the four replicate sites of two different habitat types (Q: *Quercus coccifera* shrublands, P: *Pinus brutia* forests) and three different disturbance regimes (c: core, pr: periphery not invaded, inv: periphery invaded by *Solanum elaeagnifolium*).

| Samples | Microbia | Bacteria | G+     | G-    | Actinobacteria | Fungi | Protozoa | Microeukaryotes |
|---------|----------|----------|--------|-------|----------------|-------|----------|-----------------|
| Qc1     | 153.57   | 77.92    | 40.12  | 18.12 | 14.85          | 5.66  | 1.30     | 7.21            |
| Qc2     | 232.63   | 121.53   | 63.23  | 30.70 | 19.13          | 9.12  | 2.32     | 6.88            |
| Qc3     | 165.34   | 84.03    | 45.52  | 20.22 | 11.82          | 7.25  | 1.59     | 5.39            |
| Qc4     | 152.37   | 66.10    | 33.19  | 18.28 | 9.96           | 7.40  | 1.49     | 5.46            |
| Qpr1    | 182.17   | 97.93    | 49.85  | 24.02 | 18.43          | 7.18  | 1.50     | 6.92            |
| Qpr2    | 218.83   | 114.44   | 61.37  | 28.97 | 17.38          | 7.90  | 1.85     | 5.74            |
| Qpr3    | 226.73   | 114.82   | 59.33  | 29.72 | 17.72          | 11.01 | 2.00     | 5.67            |
| Qpr4    | 148.10   | 73.17    | 40.12  | 17.28 | 10.06          | 6.13  | 2.13     | 7.37            |
| Qinv1   | 135.31   | 65.81    | 35.32  | 16.25 | 11.52          | 5.49  | 1.28     | 6.61            |
| Qinv2   | 162.00   | 83.43    | 45.62  | 19.14 | 12.64          | 5.25  | 1.44     | 5.36            |
| Qinv3   | 302.25   | 157.67   | 84.96  | 38.67 | 23.99          | 12.31 | 3.33     | 10.26           |
| Qinv4   | 282.84   | 145.19   | 79.80  | 29.76 | 26.29          | 11.15 | 3.50     | 9.47            |
| Pc1     | 400.60   | 204.00   | 100.47 | 59.33 | 28.33          | 21.91 | 2.40     | 19.57           |
| Pc2     | 361.39   | 174.01   | 85.00  | 48.43 | 29.70          | 22.08 | 2.00     | 22.36           |
| Pc3     | 295.08   | 154.03   | 77.10  | 42.58 | 23.56          | 17.06 | 2.60     | 15.98           |
| Pc4     | 409.77   | 205.75   | 101.25 | 55.52 | 32.33          | 20.12 | 3.40     | 24.83           |
| Ppr1    | 379.83   | 188.60   | 92.00  | 52.71 | 30.30          | 18.14 | 3.00     | 25.34           |
| Ppr2    | 360.52   | 177.84   | 94.14  | 47.62 | 24.18          | 16.05 | 3.73     | 26.74           |
| Ppr3    | 396.54   | 196.59   | 92.37  | 53.56 | 34.82          | 19.37 | 2.69     | 29.53           |
| Ppr4    | 365.03   | 170.00   | 73.18  | 58.50 | 26.56          | 18.01 | 3.89     | 28.13           |
| Pinv1   | 300.78   | 150.86   | 73.74  | 43.49 | 21.91          | 14.41 | 4.26     | 15.83           |
| Pinv2   | 343.48   | 189.04   | 95.09  | 48.83 | 30.24          | 15.18 | 2.87     | 17.05           |
| Pinv3   | 258.60   | 132.52   | 65.16  | 38.02 | 19.98          | 12.42 | 3.61     | 14.41           |
| Pinv4   | 295.48   | 130.54   | 75.86  | 20.83 | 24.02          | 14.86 | 3.43     | 17.28           |

**Table S3.** Abundance of nematode trophic groups in each composite sample taken from the four replicate sites of two different habitat types (Q: *Quercus coccirefa* shrublands, P: *Pinus brutia* forests) and three different disturbance regimes (c: core, pr: periphery not invaded, inv: periphery invaded by *Solanum elaeagnifolium*).

| Samples | Total abundance | Root/ fungal feeders | Plant parasitic | Bacterivores | Fungivores | Predators | Omnivores |
|---------|-----------------|----------------------|-----------------|--------------|------------|-----------|-----------|
| Qc1     | 871.17          | 260.26               | 234.24          | 229.19       | 147.48     | 0.00      | 0.00      |
| Qc2     | 1367.63         | 205.14               | 13.68           | 847.93       | 273.53     | 27.35     | 0.00      |
| Qc3     | 2243.66         | 571.92               | 384.02          | 474.53       | 813.19     | 0.00      | 0.00      |
| Qc4     | 1743.08         | 371.13               | 122.93          | 581.44       | 602.97     | 64.60     | 0.00      |
| Qpr1    | 1050.43         | 312.85               | 208.57          | 274.11       | 243.33     | 11.59     | 0.00      |
| Qpr2    | 727.19          | 189.07               | 138.17          | 210.89       | 145.44     | 43.63     | 0.00      |
| Qpr3    | 1158.67         | 182.93               | 117.60          | 434.23       | 397.79     | 26.13     | 0.00      |
| Qpr4    | 934.55          | 302.17               | 87.73           | 378.95       | 165.71     | 0.00      | 0.00      |
| Qinv1   | 2203.49         | 318.88               | 1099.27         | 564.18       | 196.63     | 0.00      | 24.53     |
| Qinv2   | 1606.81         | 265.86               | 336.48          | 788.47       | 182.78     | 16.62     | 16.62     |
| Qinv3   | 668.03          | 222.85               | 112.17          | 149.85       | 183.16     | 0.00      | 0.00      |
| Qinv4   | 1374.81         | 109.99               | 838.64          | 247.47       | 178.73     | 0.00      | 0.00      |
| Pc1     | 12913.80        | 155.46               | 470.27          | 8138.73      | 4149.35    | 0.00      | 0.00      |
| Pc2     | 688.85          | 34.44                | 6.89            | 247.99       | 399.53     | 0.00      | 0.00      |
| Pc3     | 1304.42         | 13.48                | 64.11           | 754.97       | 458.38     | 13.48     | 0.00      |
| Pc4     | 1727.17         | 103.63               | 69.09           | 846.31       | 690.87     | 17.27     | 0.00      |
| Ppr1    | 1214.17         | 163.05               | 69.88           | 398.92       | 570.67     | 11.65     | 0.00      |
| Ppr2    | 2058.64         | 331.24               | 110.41          | 888.26       | 728.73     | 0.00      | 0.00      |
| Ppr3    | 1798.55         | 346.65               | 40.78           | 595.48       | 754.47     | 61.17     | 0.00      |
| Ppr4    | 2256.07         | 0.00                 | 34.72           | 1457.41      | 763.93     | 0.00      | 0.00      |
| Pinv1   | 554.12          | 20.34                | 40.68           | 340.54       | 142.39     | 0.00      | 10.17     |
| Pinv2   | 804.90          | 112.69               | 201.23          | 321.96       | 160.98     | 8.05      | 0.00      |
| Pinv3   | 636.87          | 63.69                | 6.37            | 343.91       | 210.17     | 12.74     | 0.00      |
| Pinv4   | 1069.84         | 32.10                | 160.48          | 609.81       | 235.37     | 32.10     | 0.00      |

**Table S4.** List of Greek native plant species and subspecies found in *Quercus coccifera* shrublands (Q) and *Pinus brutia* forests (P) at three different disturbance regimes (c: core, pr: periphery not invaded, inv: periphery invaded by *Solanum elaeagnifolium*). The presence of plants is indicated by colored cells.

|                                                                                                   | Qc | Qpr | Qinv | Pc | Ppr | Pinv |
|---------------------------------------------------------------------------------------------------|----|-----|------|----|-----|------|
| <i>Acinos alpinus</i> (L.) Moench subsp. <i>nomismophyllus</i> (Rech. fil.) Leblebici             |    |     |      |    |     |      |
| <i>Acinos suaveolens</i> (Sm.) Loudon                                                             |    |     |      |    |     |      |
| <i>Alkanna tinctoria</i> Tausch subsp. <i>tinctoria</i>                                           |    |     |      |    |     |      |
| <i>Allium rhodopeum</i> Velen.                                                                    |    |     |      |    |     |      |
| <i>Allium sphaerocephalon</i> L. subsp. <i>sphaerocephalon</i>                                    |    |     |      |    |     |      |
| <i>Alyssum simplex</i> Rudolphi                                                                   |    |     |      |    |     |      |
| <i>Anacamptis pyramidalis</i> (L.) Rich.                                                          |    |     |      |    |     |      |
| <i>Anthyllis hermanniae</i> L. subsp. <i>hermanniae</i>                                           |    |     |      |    |     |      |
| <i>Asparagus aphyllus</i> L. subsp. <i>aphyllus</i>                                               |    |     |      |    |     |      |
| <i>Avena barbata</i> Link                                                                         |    |     |      |    |     |      |
| <i>Ballota nigra</i> L.                                                                           |    |     |      |    |     |      |
| <i>Brachypodium sylvaticum</i> (Huds.) P. Beauv. subsp. <i>sylvaticum</i>                         |    |     |      |    |     |      |
| <i>Bromus madritensis</i> L.                                                                      |    |     |      |    |     |      |
| <i>Celtis australis</i> L.                                                                        |    |     |      |    |     |      |
| <i>Centaurea grisebachii</i> (Nyman) Heldr. subsp. <i>grisebachii</i>                             |    |     |      |    |     |      |
| <i>Chrysopogon gryllus</i> (L.) Trin.                                                             |    |     |      |    |     |      |
| <i>Cistus creticus</i> L. subsp. <i>creticus</i>                                                  |    |     |      |    |     |      |
| <i>Convolvulus althaeoides</i> L.                                                                 |    |     |      |    |     |      |
| <i>Crupina crupinastrum</i> (Moris) Vis.                                                          |    |     |      |    |     |      |
| <i>Cupressus sempervirens</i> L.                                                                  |    |     |      |    |     |      |
| <i>Cynosurus echinatus</i> L.                                                                     |    |     |      |    |     |      |
| <i>Dactylis glomerata</i> subsp. <i>hispanica</i> (Roth) Nyman                                    |    |     |      |    |     |      |
| <i>Dasypyrum villosum</i> (L.) P. Candargy                                                        |    |     |      |    |     |      |
| <i>Dianthus corymbosus</i> Sm.                                                                    |    |     |      |    |     |      |
| <i>Dianthus illyricus</i> (Ard.) Fassou, N.Korotkova, Dimop. & Borsch                             |    |     |      |    |     |      |
| <i>Dianthus illyricus</i> (Ard.) Fassou, N.Korotkova, Dimop. & Borsch subsp. <i>illyricus</i>     |    |     |      |    |     |      |
| <i>Dianthus illyricus</i> subsp. <i>haynaldianus</i> (Nyman) Fassou, N.Korotkova, Dimop. & Borsch |    |     |      |    |     |      |
| <i>Dianthus pinifolius</i> Sm. subsp. <i>pinifolius</i>                                           |    |     |      |    |     |      |
| <i>Echium plantagineum</i> L.                                                                     |    |     |      |    |     |      |
| <i>Eryngium campestre</i> L.                                                                      |    |     |      |    |     |      |
| <i>Erysimum crassistylum</i> C. Presl                                                             |    |     |      |    |     |      |
| <i>Festuca valesiaca</i> Gaudin                                                                   |    |     |      |    |     |      |
| <i>Fumana thymifolia</i> (L.) Webb                                                                |    |     |      |    |     |      |
| <i>Helianthemum salicifolium</i> (L.) Mill.                                                       |    |     |      |    |     |      |
| <i>Hirschfeldia incana</i> (L.) Lagr.-Foss.                                                       |    |     |      |    |     |      |
| <i>Hypericum olympicum</i> L.                                                                     |    |     |      |    |     |      |
| <i>Hypericum perforatum</i> L.                                                                    |    |     |      |    |     |      |
| <i>Juniperus oxycedrus</i> subsp. <i>deltoides</i> (R.P. Adams) N.G. Passal.                      |    |     |      |    |     |      |
| <i>Malabaila aurea</i> (Sm.) Boiss.                                                               |    |     |      |    |     |      |
| <i>Melica ciliata</i> L. subsp. <i>ciliata</i>                                                    |    |     |      |    |     |      |
| <i>Melilotus albus</i> Medik.                                                                     |    |     |      |    |     |      |
| <i>Micromeria juliana</i> (L.) Rchb.                                                              |    |     |      |    |     |      |
| <i>Minuartia attica</i> (Boiss. & Spruner) Vierh. subsp. <i>attica</i>                            |    |     |      |    |     |      |
| <i>Nigella arvensis</i> L.                                                                        |    |     |      |    |     |      |
| <i>Onopordum illyricum</i> subsp. <i>cardunculus</i> (Boiss.) Arènes                              |    |     |      |    |     |      |

|                                                                 | Qc | Qpr | Qinv | Pc | Ppr | Pinv |
|-----------------------------------------------------------------|----|-----|------|----|-----|------|
| <i>Phillyrea latifolia</i> L.                                   |    |     |      |    |     |      |
| <i>Piptatherum miliaceum</i> (L.) Coss.                         |    |     |      |    |     |      |
| <i>Piptatherum miliaceum</i> (L.) Coss. subsp. <i>miliaceum</i> |    |     |      |    |     |      |
| <i>Prunus spinosa</i> subsp. <i>dasyphylla</i> (Schur) Domin    |    |     |      |    |     |      |
| <i>Rostraria cristata</i> (L.) Tzvelev                          |    |     |      |    |     |      |
| <i>Salvia verbenaca</i> L.                                      |    |     |      |    |     |      |
| <i>Sarcopoterium spinosum</i> (L.) Spach                        |    |     |      |    |     |      |
| <i>Scabiosa triniifolia</i> Friv.                               |    |     |      |    |     |      |
| <i>Silene gigantea</i> subsp. <i>rhodopea</i> (Janka) Greuter   |    |     |      |    |     |      |
| <i>Stipa capensis</i> Thunb.                                    |    |     |      |    |     |      |
| <i>Teucrium capitatum</i> L.                                    |    |     |      |    |     |      |
| <i>Thymus sibthorpii</i> Benth.                                 |    |     |      |    |     |      |
| <i>Trifolium angustifolium</i> L.                               |    |     |      |    |     |      |
| <i>Trifolium stellatum</i> L.                                   |    |     |      |    |     |      |
| <i>Verbascum leucophyllum</i> Griseb.                           |    |     |      |    |     |      |
| <i>Verbascum undulatum</i> Lam.                                 |    |     |      |    |     |      |
| <b>Number of species</b>                                        | 23 | 34  | 29   | 11 | 26  | 13   |
